# Supplementary material for: Long-read whole genome sequencing and comparative analysis of six strains of the human pathogen Orientia tsutsugamushi
Source: PubMed Central journal article supplement (PMC6005640; doi:10.1371/journal.pntd.0006566), 2018-06-06
Supplement: pntd.0006566.s001.pdf [file pntd.0006566.s001.pdf]

## **Supplementary Figures and Tables**

### Long-read whole genome sequencing and comparative analysis of six strains of the human pathogen *Orientia tsutsugamushi*

Elizabeth M. Batty<sup>a,b,c</sup>, Suwittra Chaemchuen<sup>b</sup>, Stuart D. Blacksell<sup>b,c</sup>, Allan Richards<sup>j</sup>, Daniel Paris<sup>b,c,d,e</sup>, Rory Bowden<sup>a</sup>, Caroline Chan<sup>f</sup>, Ramkumar Lachumanan<sup>f</sup>, Nicholas Day<sup>b,c</sup>, Peter Donnelly<sup>a,g</sup>, Swaine L. Chen<sup>h,i</sup>, Jeanne Salje<sup>b,c,#</sup>

Wellcome Centre for Human Genetics, University of Oxford, Oxford, OX1 7BN, UK<sup>a</sup> ;

Mahidol-Oxford Tropical Medicine Research Unit, Faculty of Tropical Medicine, Mahidol University, Bangkok, Thailand<sup>b</sup> ;

Centre for Tropical Medicine and Global Health, Nuffield Department of Medicine, University of Oxford, Oxford, United Kingdom<sup>c</sup> ;

Swiss Tropical and Public Health Institute, Basel, Switzerland<sup>d</sup> ;

Faculty of Medicine, University Basel, Basel, Switzerland<sup>e</sup> ;

Pacific Biosciences, 1305 O'Brien Drive, Menlo Park, CA 94025, USA<sup>f</sup> ;

Department of Statistics, University of Oxford, Oxford, OX1 3TG, UK<sup>g</sup>

Department of Medicine, Division of Infectious Diseases, Yong Loo Lin School of Medicine, National University of Singapore, Singapore<sup>h</sup>

Genome Institute of Singapore, A\*STAR, Singapore 138672<sup>i</sup>

US Naval Medicine Research Center, Silver Spring, Maryland, USA<sup>j</sup>

# Address correspondence to Jeanne Salje: [jeanne.salje@ndm.ox.ac.uk](mailto:jeanne.salje@ndm.ox.ac.uk)

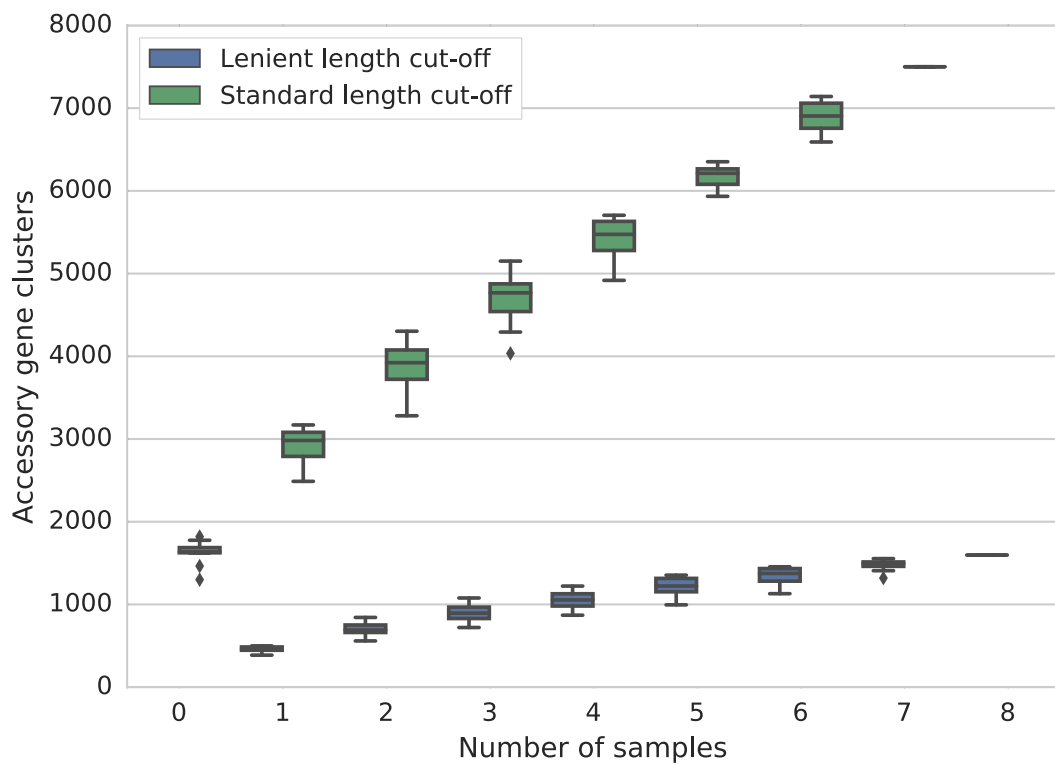

**Figure S1.** Boxplot showing how the number of accessory genes clusters varies with number of samples using the standard length cut-off and a more lenient length cut-off when determining clusters. Using the same identity thresholds but allowing the genes to be shorter reduces the number of new clusters identified as samples are added.

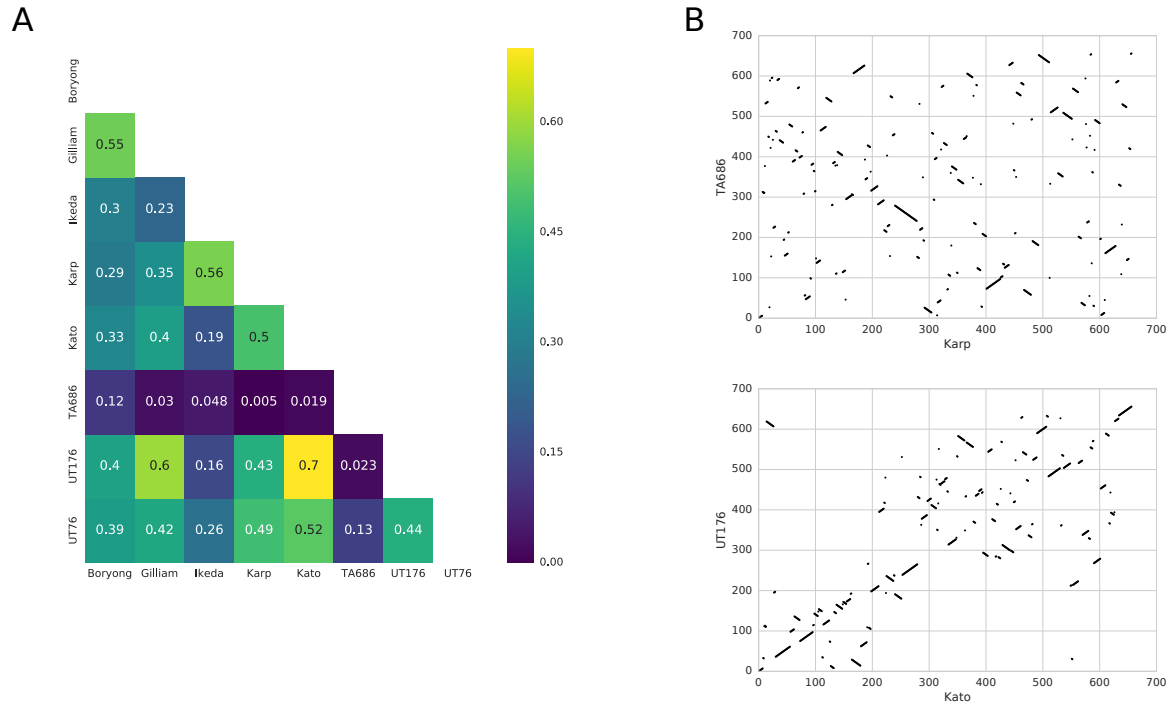

**Figure S2.** A - Heatmap showing the correlation in gene order between each pair of samples. B – dotplots showing the gene ordering between the pair with the highest correlation (Kato and UT176) and the lowest correlation (Karp and TA686).

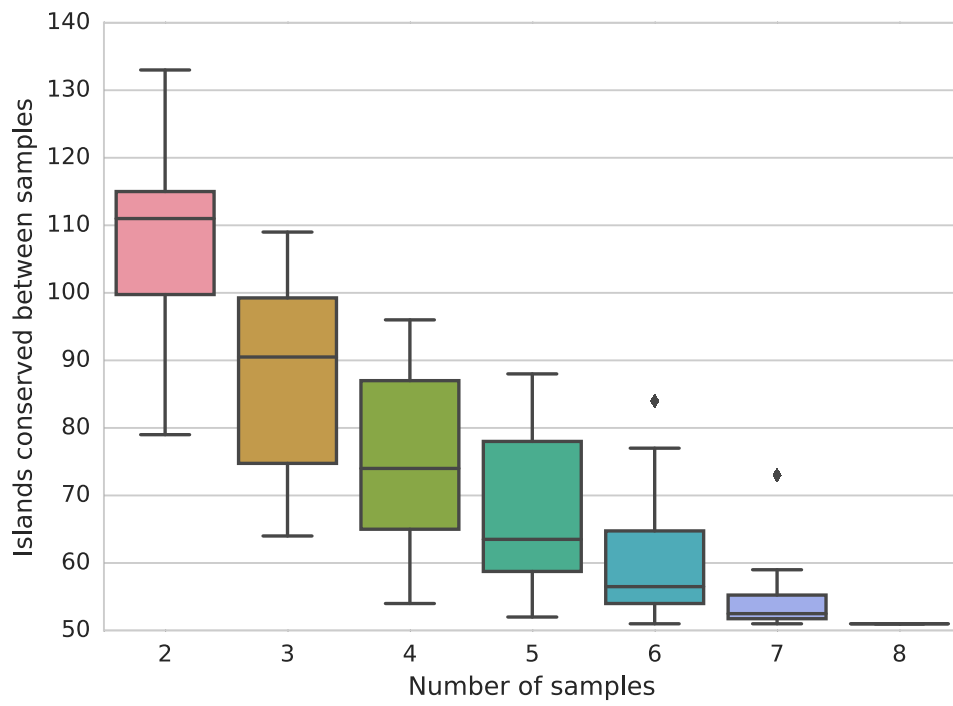

**Figure S3.** Boxplot showing the number of islands conserved between samples across all different combinations of samples.

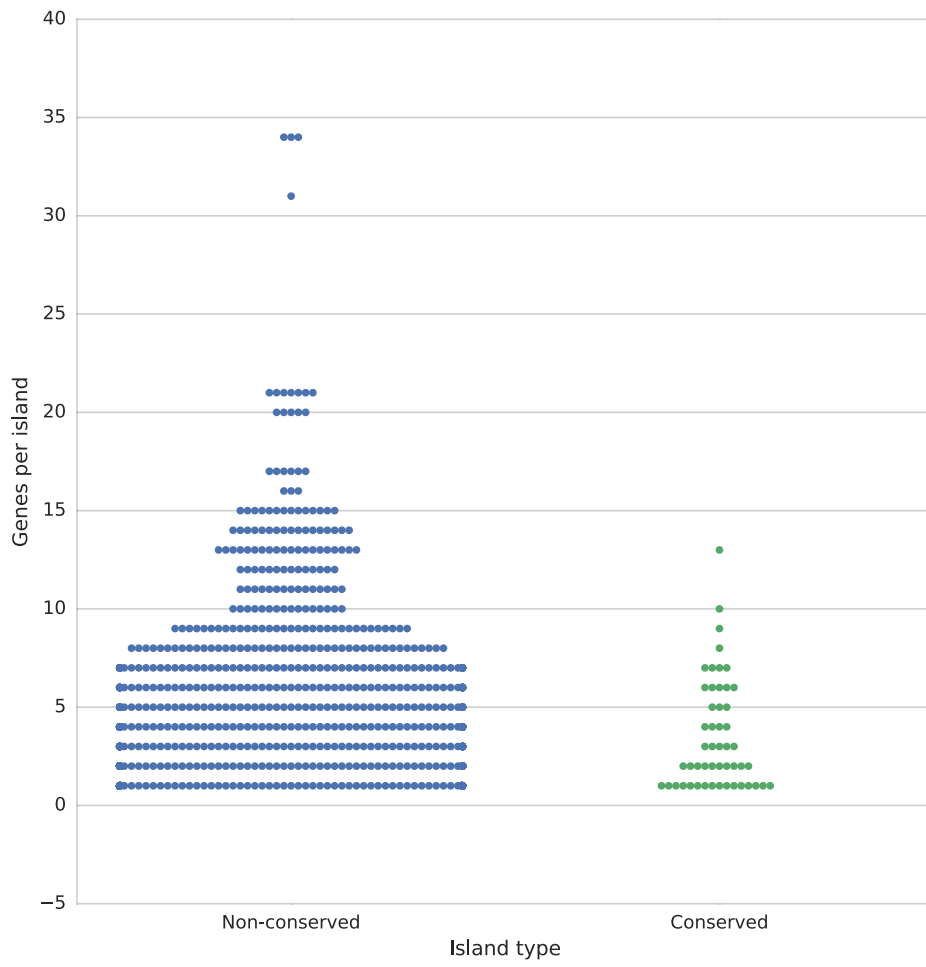

**Figure S4.** The number of genes per island in conserved versus non-conserved islands.

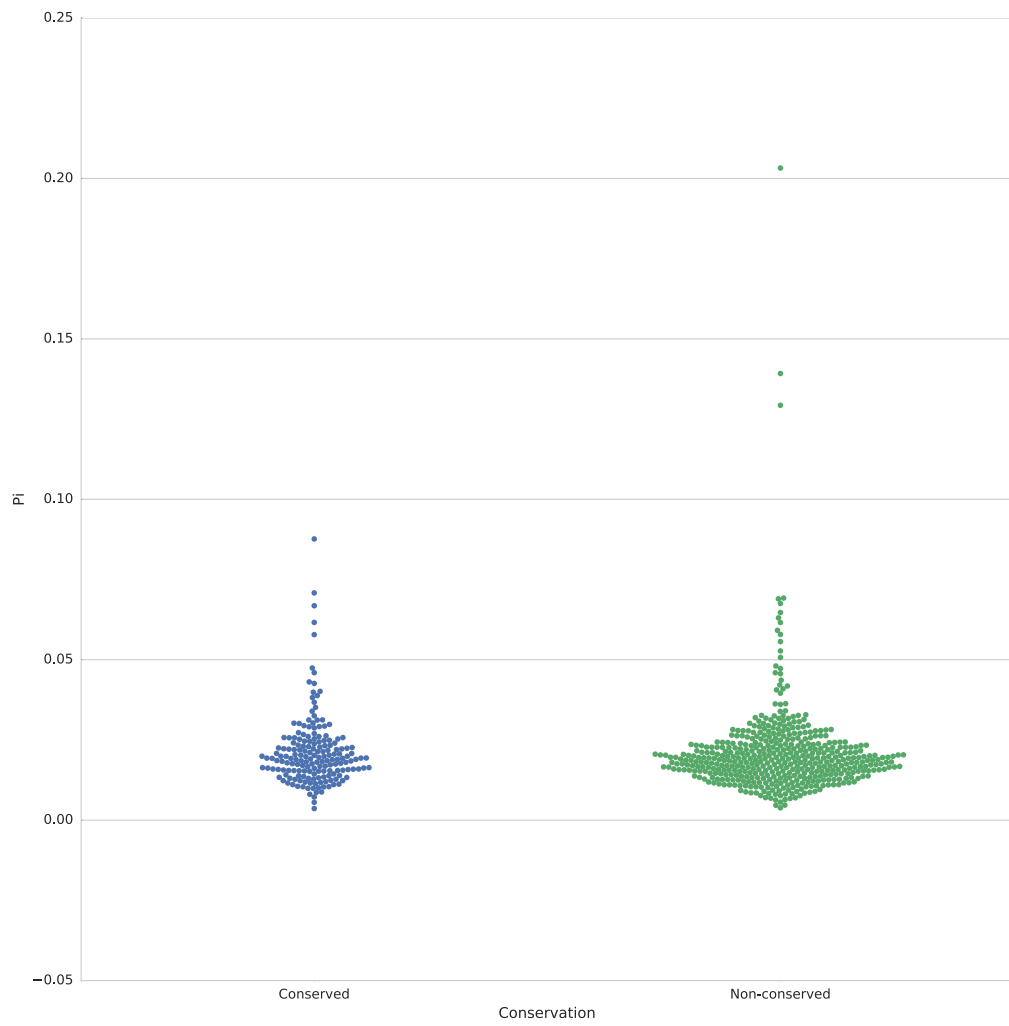

**Figure S5.** The nucleotide sequence diversity ( $\pi$ ) in genes in conserved and non-conserved islands.

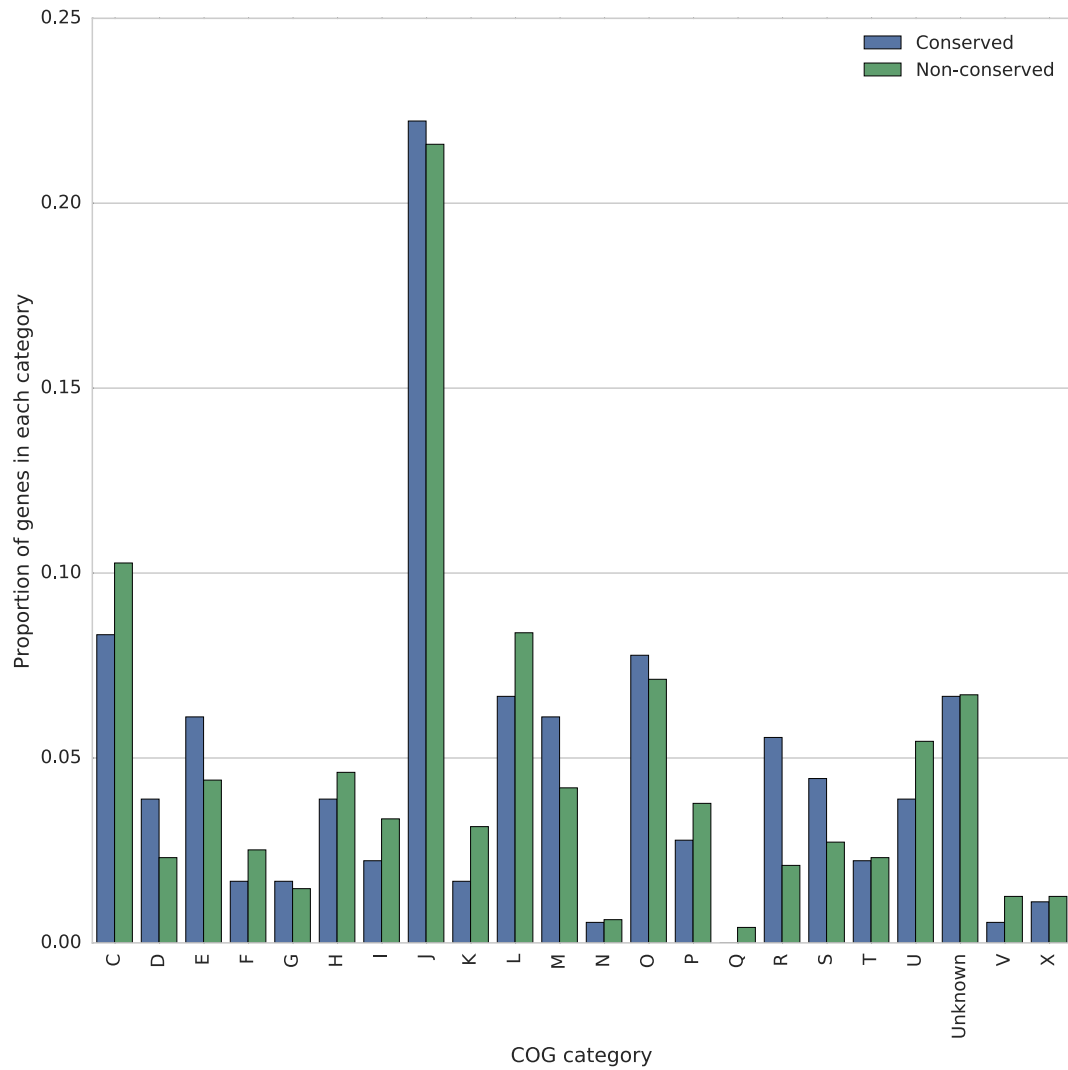

**Figure S6.** The proportion of core genes which are in conserved and non-conserved islands in each COG category.

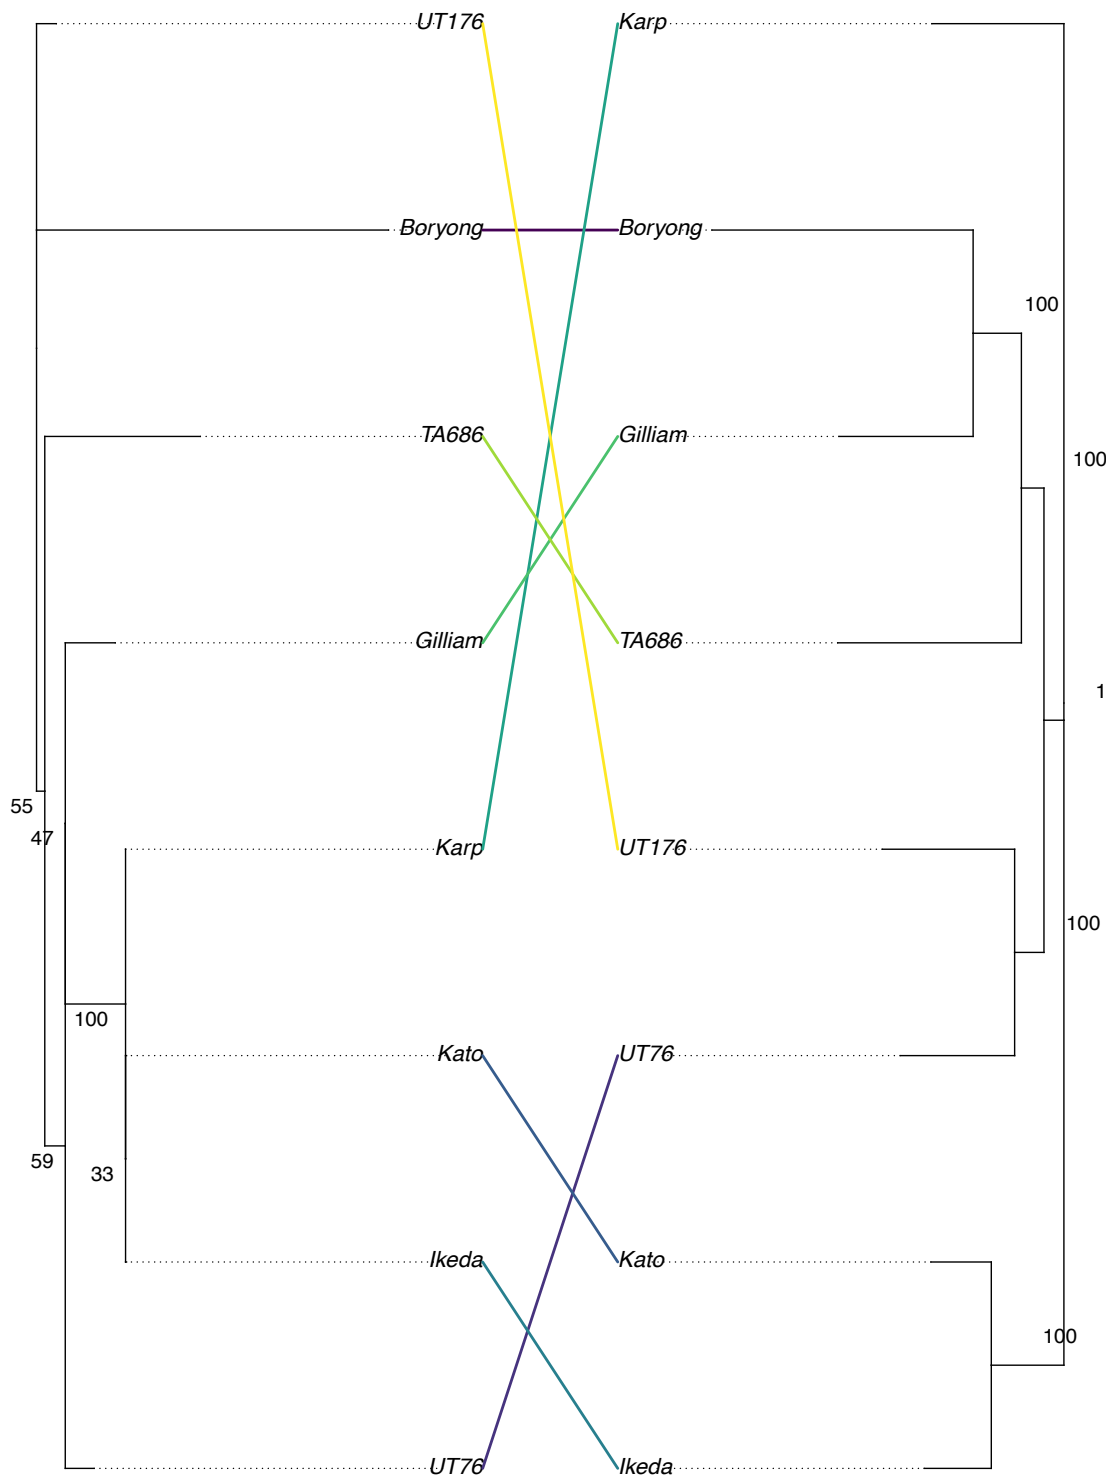

**Figure S7.** A phylogenetic tree showing the relationship between a tree generated using the 47kDa antigen sequences, and the sequences of 657 core genes.



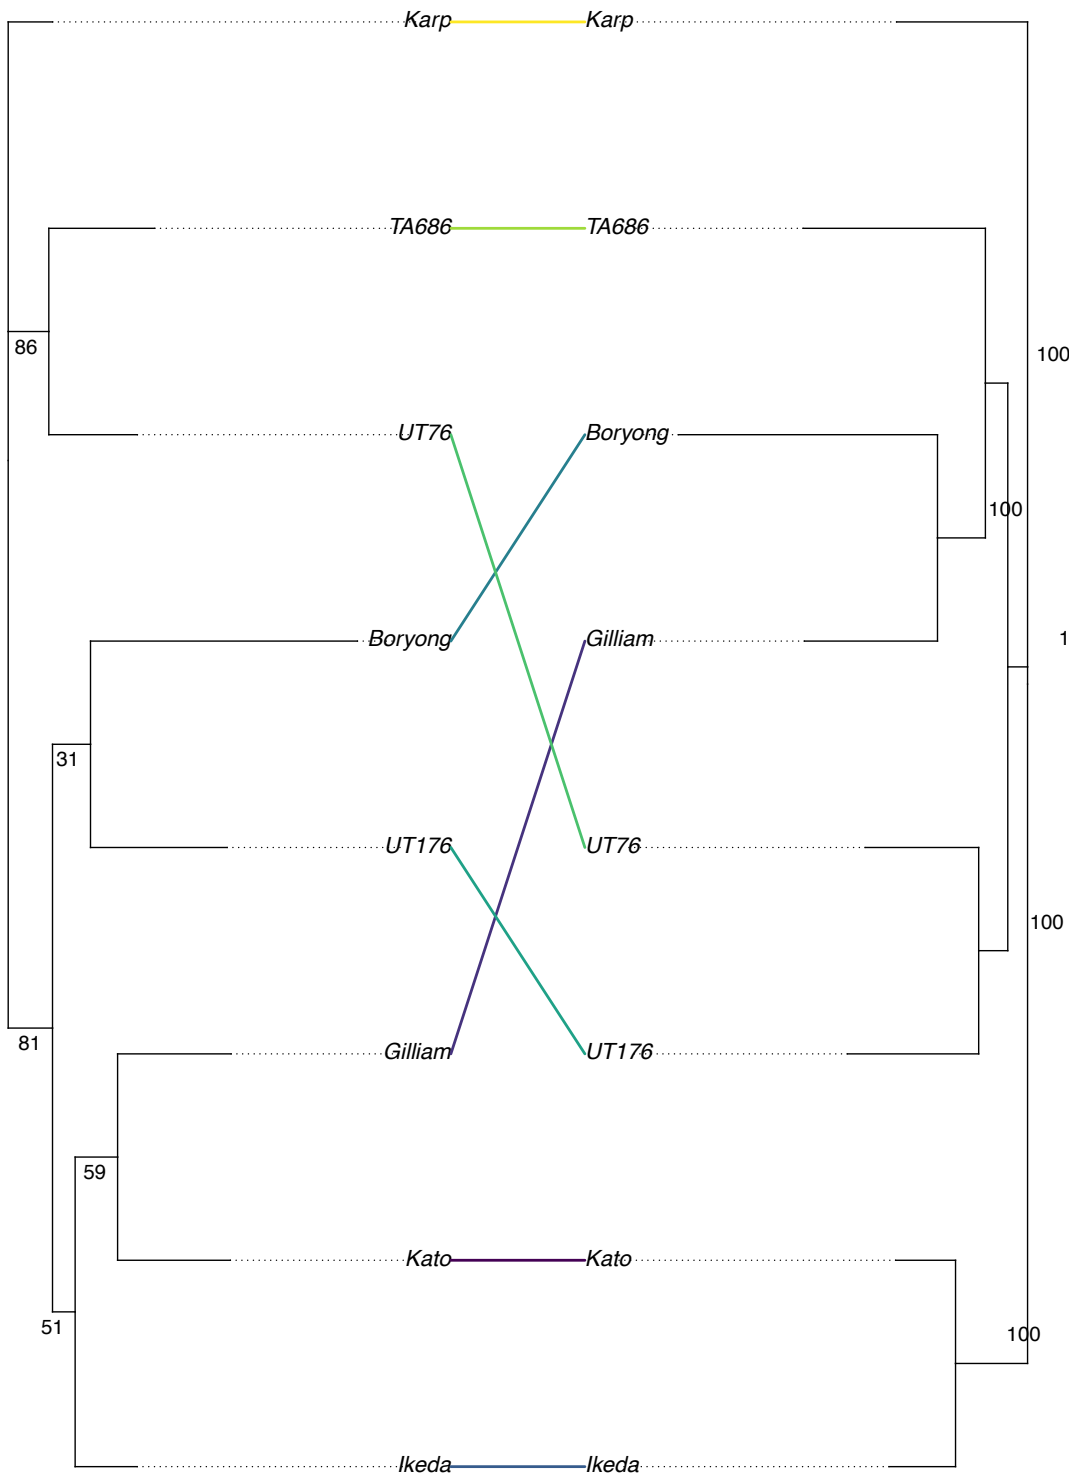

**Figure S8.** A phylogenetic tree showing the relationship between a tree generated using MLST gene sequences, and the sequences of 657 core genes. The 7 MLST genes (*gpsA*, *mdh*, *nrdB*, *nuoF*, *ppdK*, *sucD*, and *sucB*) are taken from the scheme developed by Sonthayanon et al., 2010.

| Strain  | Illumina sequencing           | Illumina accession | Illumina read length | Illumina base pairs generated (Gbp) | Illumina coverage | PacBio accession | PacBio base pairs generated (Gbp) | PacBio number of reads | PacBio n50 read length | PacBio mean read length | PacBio coverage |
|---------|-------------------------------|--------------------|----------------------|-------------------------------------|-------------------|------------------|-----------------------------------|------------------------|------------------------|-------------------------|-----------------|
| Karp    | Institute for Genome Sciences | PRJNA212440        | 300bp paired-end     | 3.15                                | 1434              | PRJEB24834       | 0.31                              | 20,789                 | 23,354                 | 15,147                  | 143             |
| Kato    | Institute for Genome Sciences | PRJNA212441        | 300bp paired-end     | 3.23                                | 1469              | PRJEB24834       | 1.35                              | 75,987                 | 28,132                 | 17,782                  | 614             |
| Gilliam | Institute for Genome Sciences | PRJNA212442        | 300bp paired-end     | 3.30                                | 1501              | PRJEB24834       | 1.37                              | 81,890                 | 40,494                 | 16,678                  | 621             |
| TA686   | MicrobesNG                    | PRJEB24834         | 250bp paired-end     | 1.39                                | 63                | PRJEB24834       | 0.35                              | 23,153                 | 22,742                 | 15,013                  | 158             |
| TA763   | Institute for Genome Sciences | PRJNA212454        | 300bp paired-end     | 4.30                                | 1954              | PRJEB24834       | 2.10                              | 84,163                 | 41,496                 | 24,912                  | 953             |
| FPW1038 | Oxford Genomics Centre        | PRJEB24834         | 300bp paired-end     | 1.63                                | 742               | PRJEB24834       | 2.37                              | 95,037                 | 40,662                 | 24,910                  | 1076            |
| UT76    | Oxford Genomics Centre        | PRJEB24834         | 300bp paired-end     | 0.78                                | 357               | PRJEB24834       | 0.69                              | 46,978                 | 28,716                 | 14,698                  | 314             |
| UT176   | Oxford Genomics Centre        | PRJEB24834         | 300bp paired-end     | 2,286,026,448                       | 1039              | PRJEB24834       | 647,714,986                       | 45,432                 | 20,728                 | 14,256                  | 294             |

**Table S1.** Data sources and sequencing statistics for the Illumina and PacBio sequencing data used in this study. Coverage has been estimated based on the base pairs of sequence data generated divided by the length of the 2.2Mb reference genome. All PacBio data was generated by the Genome Institute of Singapore.

| Genome                                                     | NCBI Identifier |
|------------------------------------------------------------|-----------------|
| <i>Orientia tsutsugamushi</i> strain Boryong               | GCF_000063545.1 |
| <i>Orientia tsutsugamushi</i> strain Ikeda                 | GCF_000010205.1 |
| <i>Rickettsia typhi</i> strain Wilmington                  | GCF_000008045.1 |
| <i>Rickettsia</i> endosymbiont of <i>Ixodes scapularis</i> | GCF_000160735.1 |

**Table S2.** NCBI identifiers for previously published strains used in this paper.

| Sample  | Genome Length | Length of core genes | Core genes as proportion of genome | Length of repeat genes | Repeat genes as percentage of genome |
|---------|---------------|----------------------|------------------------------------|------------------------|--------------------------------------|
| Boryong | 2127051       | 679631               | 0.32                               | 748541                 | 35                                   |
| Gilliam | 2465012       | 681491               | 0.28                               | 1165831                | 47                                   |
| Ikeda   | 2008987       | 683889               | 0.34                               | 757868                 | 38                                   |
| Karp    | 2469803       | 682061               | 0.28                               | 1163785                | 47                                   |
| Kato    | 2319449       | 682142               | 0.29                               | 1039243                | 45                                   |
| TA686   | 2254553       | 682706               | 0.30                               | 933469                 | 41                                   |
| UT176   | 1932116       | 681689               | 0.35                               | 738572                 | 38                                   |
| UT76    | 2078193       | 682964               | 0.33                               | 826716                 | 40                                   |

**Table S3.** Core gene and core repeat statistics.

**Table S4.** Core genes calculated by Roary. Gene names are given for the Karp strain.

| Gene group | Group number | Annotation                                                                            | Gene name | Boryong           | Gilliam           | Ikeda           | Karp       | Kato       | TA686           | UT176           | UT76-HP       |
|------------|--------------|---------------------------------------------------------------------------------------|-----------|-------------------|-------------------|-----------------|------------|------------|-----------------|-----------------|---------------|
| clpP       | 1            | ATP-dependent Clp protease proteolytic subunit                                        |           | Boryong_01<br>567 | Gilliam_019<br>42 | Ikeda_0042<br>3 | Karp_01574 | Kato_01535 | TA686_0207<br>9 | UT176_017<br>55 | UT76-HP_01648 |
| gatB       | 2            | aspartyl/glutamyl-tRNA(Asn/Gln) amidotransferase subunit B                            | GatB      | Boryong_01<br>584 | Gilliam_019<br>57 | Ikeda_0040<br>9 | Karp_01279 | Kato_01521 | TA686_0028<br>8 | UT176_017<br>41 | UT76-HP_01661 |
| gatA       | 2            | glutamyl-tRNA(Gln) amidotransferase subunit A                                         | GatA      | Boryong_01<br>583 | Gilliam_019<br>56 | Ikeda_0041<br>0 | Karp_01280 | Kato_01522 | TA686_0028<br>9 | UT176_017<br>42 | UT76-HP_01660 |
| group_5707 | 2            | aspartyl/glutamyl-tRNA(Asn/Gln) amidotransferase subunit C                            | GatC      | Boryong_01<br>582 | Gilliam_019<br>55 | Ikeda_0041<br>1 | Karp_01281 | Kato_01523 | TA686_0029<br>0 | UT176_017<br>43 | UT76-HP_01659 |
| group_6080 | 2            | RNase J family beta-CASP ribonuclease                                                 |           | Boryong_01<br>581 | Gilliam_019<br>54 | Ikeda_0041<br>2 | Karp_01282 | Kato_01524 | TA686_0029<br>1 | UT176_017<br>44 | UT76-HP_01658 |
| group_7975 | 2            | DNA-binding response regulator                                                        |           | Boryong_01<br>580 | Gilliam_019<br>53 | Ikeda_0041<br>3 | Karp_01283 | Kato_01525 | TA686_0029<br>2 | UT176_017<br>45 | UT76-HP_01657 |
| group_250  | 3            | transposase                                                                           |           | Boryong_00<br>790 | Gilliam_027<br>03 | Ikeda_0211<br>8 | Karp_00040 | Kato_00709 | TA686_0116<br>2 | UT176_005<br>74 | UT76-HP_00998 |
| group_5845 | 3            | multidrug ABC transporter ATP-binding protein                                         |           | Boryong_00<br>791 | Gilliam_027<br>04 | Ikeda_0211<br>9 | Karp_00041 | Kato_00710 | TA686_0116<br>1 | UT176_005<br>73 | UT76-HP_00999 |
| group_7831 | 3            | UMP kinase                                                                            |           | Boryong_00<br>792 | Gilliam_027<br>05 | Ikeda_0212<br>0 | Karp_00042 | Kato_00711 | TA686_0116<br>0 | UT176_005<br>72 | UT76-HP_01000 |
| group_5846 | 3            | phospho-N-acetylmuramoyl-pentapeptide- transferase                                    | MraY      | Boryong_00<br>793 | Gilliam_027<br>06 | Ikeda_0212<br>1 | Karp_00043 | Kato_00712 | TA686_0115<br>9 | UT176_005<br>71 | UT76-HP_01001 |
| group_5550 | 3            | UDP-N-acetylmuramoylalanyl-D-glutamyl-2, 6-diaminopimelate--D-alanyl-D-alanine ligase | MurF      | Boryong_00<br>794 | Gilliam_027<br>07 | Ikeda_0212<br>2 | Karp_00044 | Kato_00713 | TA686_0115<br>8 | UT176_005<br>70 | UT76-HP_01002 |
| group_5397 | 3            | UDP-N-acetylmuramoyl-L-alanyl-D-glutamate--2, 6-diaminopimelate ligase                | MurE      | Boryong_00<br>795 | Gilliam_027<br>08 | Ikeda_0212<br>3 | Karp_00045 | Kato_00714 | TA686_0115<br>7 | UT176_005<br>69 | UT76-HP_01003 |
| group_5847 | 3            | penicillin-binding protein                                                            | PBP       | Boryong_00<br>796 | Gilliam_027<br>09 | Ikeda_0212<br>4 | Karp_00046 | Kato_00715 | TA686_0115<br>6 | UT176_005<br>68 | UT76-HP_01004 |
| ftsL       | 3            | hypothetical protein                                                                  | FtsL      | Boryong_00<br>797 | Gilliam_027<br>10 | Ikeda_0212<br>5 | Karp_00047 | Kato_00716 | TA686_0115<br>5 | UT176_005<br>67 | UT76-HP_01005 |
| group_5670 | 3            | 16S rRNA methyltransferase                                                            |           | Boryong_00<br>798 | Gilliam_027<br>11 | Ikeda_0212<br>6 | Karp_00048 | Kato_00717 | TA686_0115<br>4 | UT176_005<br>66 | UT76-HP_01006 |
| group_6027 | 3            | molecular chaperone DnaJ                                                              | DnaJ      | Boryong_00<br>799 | Gilliam_027<br>12 | Ikeda_0212<br>7 | Karp_00049 | Kato_00718 | TA686_0115<br>3 | UT176_005<br>65 | UT76-HP_01007 |
| group_7111 | 3            | molecular chaperone DnaK                                                              | DnaK      | Boryong_00<br>800 | Gilliam_027<br>13 | Ikeda_0212<br>8 | Karp_00050 | Kato_00719 | TA686_0115<br>2 | UT176_005<br>64 | UT76-HP_01008 |
| group_6028 | 3            | BolA family transcriptional regulator                                                 |           | Boryong_00<br>801 | Gilliam_027<br>14 | Ikeda_0212<br>9 | Karp_00051 | Kato_00720 | TA686_0115<br>1 | UT176_005<br>63 | UT76-HP_01009 |
| group_5671 | 3            | enoyl-ACP reductase                                                                   | ENR       | Boryong_00<br>802 | Gilliam_027<br>15 | Ikeda_0213<br>0 | Karp_00052 | Kato_00721 | TA686_0115<br>0 | UT176_005<br>62 | UT76-HP_01010 |
| group_4752 | 4            | sodium:proline symporter                                                              |           | Boryong_00<br>980 | Gilliam_006<br>83 | Ikeda_0186<br>3 | Karp_00697 | Kato_02375 | TA686_0210<br>2 | UT176_020<br>68 | UT76-HP_02241 |
| group_5324 | 5            | hypothetical protein                                                                  |           | Boryong_00<br>010 | Gilliam_000<br>14 | Ikeda_0177<br>8 | Karp_00009 | Kato_00009 | TA686_0119<br>8 | UT176_000<br>09 | UT76-HP_00009 |
| group_5345 | 6            | hypothetical protein                                                                  |           | Boryong_00<br>676 | Gilliam_022<br>58 | Ikeda_0108<br>4 | Karp_02002 | Kato_00906 | TA686_0234<br>1 | UT176_009<br>40 | UT76-HP_01866 |
| group_5664 | 6            | UDP-N-acetylmuramate--L-alanine ligase                                                | MurC      | Boryong_00<br>675 | Gilliam_022<br>59 | Ikeda_0108<br>5 | Karp_02003 | Kato_00905 | TA686_0234<br>0 | UT176_009<br>39 | UT76-HP_01867 |
| group_5663 | 6            | UDP-N-acetylenolpyruvoylglucosamine reductase                                         | MurB      | Boryong_00<br>674 | Gilliam_022<br>60 | Ikeda_0108<br>6 | Karp_02004 | Kato_00904 | TA686_0233<br>9 | UT176_009<br>38 | UT76-HP_01868 |
| group_5839 | 6            | D-alanine--D-alanine ligase                                                           | Ddl       | Boryong_00<br>673 | Gilliam_022<br>61 | Ikeda_0108<br>7 | Karp_02005 | Kato_00903 | TA686_0233<br>8 | UT176_009<br>37 | UT76-HP_01869 |
| group_5662 | 6            | cell division protein FtsQ                                                            | FtsQ      | Boryong_00<br>672 | Gilliam_022<br>62 | Ikeda_0108<br>8 | Karp_02006 | Kato_00902 | TA686_0233<br>7 | UT176_009<br>36 | UT76-HP_01870 |
| group_5548 | 6            | DNA replication/repair protein RecF                                                   | RecF      | Boryong_00<br>671 | Gilliam_022<br>63 | Ikeda_0108<br>9 | Karp_02007 | Kato_00901 | TA686_0233<br>6 | UT176_009<br>35 | UT76-HP_01871 |
| group_5349 | 7            | hypothetical protein                                                                  |           | Boryong_01<br>099 | Gilliam_009<br>69 | Ikeda_0000<br>1 | Karp_02387 | Kato_02127 | TA686_0141<br>9 | UT176_006<br>68 | UT76-HP_00144 |
| group_6051 | 7            | virB4 protein precursor                                                               |           | Boryong_01<br>098 | Gilliam_009<br>70 | Ikeda_0000<br>2 | Karp_02388 | Kato_02126 | TA686_0141<br>8 | UT176_006<br>67 | UT76-HP_00143 |
| group_5858 | 7            | type I glyceraldehyde-3-phosphate dehydrogenase                                       | GapA      | Boryong_01<br>097 | Gilliam_009<br>71 | Ikeda_0000<br>3 | Karp_02389 | Kato_02125 | TA686_0141<br>7 | UT176_006<br>66 | UT76-HP_00142 |
| group_5857 | 7            | phosphoglycerate kinase                                                               | Pgk       | Boryong_01<br>096 | Gilliam_009<br>72 | Ikeda_0000<br>4 | Karp_02390 | Kato_02124 | TA686_0141<br>6 | UT176_006<br>65 | UT76-HP_00141 |
| group_6050 | 7            | hypothetical protein                                                                  |           | Boryong_01<br>095 | Gilliam_009<br>73 | Ikeda_0000<br>5 | Karp_02391 | Kato_02123 | TA686_0141<br>5 | UT176_006<br>64 | UT76-HP_00140 |
| group_5856 | 7            | proline--tRNA ligase                                                                  | ProS      | Boryong_01<br>094 | Gilliam_009<br>74 | Ikeda_0000<br>6 | Karp_02392 | Kato_02122 | TA686_0141<br>4 | UT176_006<br>63 | UT76-HP_00139 |

|            |    |                                                                                                 |       |                   |                   |                 |                          |   |                               |                   |
|------------|----|-------------------------------------------------------------------------------------------------|-------|-------------------|-------------------|-----------------|--------------------------|---|-------------------------------|-------------------|
| group_7234 | 7  | ATP-dependent Clp protease ATP-binding subunit ClpX                                             | ClpX  | Boryong_01<br>093 | Gilliam_009<br>75 | Ikeda_0000<br>7 | Karp_02393<br>Kato_02121 | 3 | TA686_0141<br>UT176_006<br>62 | UT76-<br>HP_00138 |
| group_8077 | 7  | elongation factor P                                                                             |       | Boryong_01<br>092 | Gilliam_009<br>76 | Ikeda_0000<br>8 | Karp_02394<br>Kato_02120 | 2 | TA686_0141<br>UT176_006<br>61 | UT76-<br>HP_00137 |
| group_6049 | 7  | extragenic suppressor protein SuhB                                                              | SuhB  | Boryong_01<br>091 | Gilliam_009<br>77 | Ikeda_0000<br>9 | Karp_02395<br>Kato_02119 | 1 | TA686_0141<br>UT176_006<br>60 | UT76-<br>HP_00136 |
| group_5557 | 7  | tRNA (adenosine(37)-N6)-threonylcarbamoyltransferase complex dimerization subunit type 1 TsaB   | TsaB  | Boryong_01<br>090 | Gilliam_009<br>78 | Ikeda_0001<br>0 | Karp_02396<br>Kato_02118 | 0 | TA686_0141<br>UT176_006<br>59 | UT76-<br>HP_00135 |
| group_5351 | 8  | hypothetical protein                                                                            |       | Boryong_01<br>511 | Gilliam_013<br>39 | Ikeda_0114<br>3 | Karp_01848<br>Kato_00841 | 1 | TA686_0023<br>UT176_013<br>64 | UT76-<br>HP_01169 |
| group_5352 | 9  | glycerol-3-phosphate dehydrogenase (NAD(P)( ))                                                  | GpsA  | Boryong_01<br>513 | Gilliam_013<br>37 | Ikeda_0114<br>5 | Karp_01850<br>Kato_00843 | 9 | TA686_0022<br>UT176_013<br>66 | UT76-<br>HP_01171 |
| group_8119 | 9  | tRNA (N(6)-L-threonylcarbamoyladenosine(37)-C(2))-methyltransferase MtaB                        | MtaB  | Boryong_01<br>514 | Gilliam_013<br>36 | Ikeda_0114<br>6 | Karp_01851<br>Kato_00844 | 8 | TA686_0022<br>UT176_013<br>67 | UT76-<br>HP_01172 |
| group_5359 | 10 | crossover junction endodeoxyribonuclease RuvC                                                   | RuvC  | Boryong_01<br>866 | Gilliam_014<br>37 | Ikeda_0105<br>3 | Karp_02233<br>Kato_00938 | 2 | TA686_0209<br>UT176_011<br>31 | UT76-<br>HP_01610 |
| group_5717 | 10 | tRNA dihydrouridine synthase DusB                                                               | DusB  | Boryong_01<br>867 | Gilliam_014<br>38 | Ikeda_0105<br>4 | Karp_02234<br>Kato_00937 | 1 | TA686_0209<br>UT176_011<br>32 | UT76-<br>HP_01611 |
| group_5494 | 10 | hypothetical protein                                                                            |       | Boryong_01<br>868 | Gilliam_014<br>39 | Ikeda_0105<br>5 | Karp_02235<br>Kato_00936 | 0 | TA686_0209<br>UT176_011<br>33 | UT76-<br>HP_01612 |
| group_5495 | 10 | bifunctional 3-demethylubiquinone 3-O-methyltransferase/2-octaprenyl-6-hydroxy phenol methylase |       | Boryong_01<br>869 | Gilliam_014<br>40 | Ikeda_0105<br>6 | Karp_02236<br>Kato_00935 | 9 | TA686_0208<br>UT176_011<br>34 | UT76-<br>HP_01613 |
| group_5718 | 10 | protein-(glutamine-N5) methyltransferase, release factor-specific                               |       | Boryong_01<br>870 | Gilliam_014<br>41 | Ikeda_0105<br>7 | Karp_02237<br>Kato_00934 | 8 | TA686_0208<br>UT176_011<br>35 | UT76-<br>HP_01614 |
| group_6104 | 10 | tRNA pseudouridine(38-40) synthase TruA                                                         | TruA  | Boryong_01<br>871 | Gilliam_014<br>42 | Ikeda_0105<br>8 | Karp_02238<br>Kato_00933 | 7 | TA686_0208<br>UT176_011<br>36 | UT76-<br>HP_01615 |
| group_7746 | 10 | 50S ribosomal protein L13                                                                       | L13   | Boryong_01<br>872 | Gilliam_014<br>43 | Ikeda_0105<br>9 | Karp_02239<br>Kato_00932 | 6 | TA686_0208<br>UT176_011<br>37 | UT76-<br>HP_01616 |
| group_5719 | 10 | 30S ribosomal protein S9                                                                        | S9    | Boryong_01<br>873 | Gilliam_014<br>44 | Ikeda_0106<br>0 | Karp_02240<br>Kato_00931 | 5 | TA686_0208<br>UT176_011<br>38 | UT76-<br>HP_01617 |
| group_5458 | 11 | rRNA (cytidine-2'-O)-methyltransferase                                                          |       | Boryong_01<br>202 | Gilliam_017<br>33 | Ikeda_0048<br>2 | Karp_01858<br>Kato_01661 | 5 | TA686_0054<br>UT176_013<br>57 | UT76-<br>HP_01640 |
| group_5865 | 11 | serine-tRNA ligase                                                                              | SerS  | Boryong_01<br>203 | Gilliam_017<br>34 | Ikeda_0048<br>1 | Karp_01859<br>Kato_01662 | 6 | TA686_0054<br>UT176_013<br>56 | UT76-<br>HP_01639 |
| group_7705 | 11 | twin-arginine translocase subunit TatC                                                          | TatC  | Boryong_01<br>204 | Gilliam_017<br>35 | Ikeda_0048<br>0 | Karp_01860<br>Kato_01663 | 7 | TA686_0054<br>UT176_013<br>55 | UT76-<br>HP_01638 |
| group_6566 | 11 | hypothetical protein                                                                            |       | Boryong_01<br>205 | Gilliam_017<br>36 | Ikeda_0047<br>9 | Karp_01861<br>Kato_01664 | 8 | TA686_0054<br>UT176_013<br>54 | UT76-<br>HP_01637 |
| group_6058 | 11 | 16S rRNA methyltransferase                                                                      |       | Boryong_01<br>206 | Gilliam_017<br>37 | Ikeda_0047<br>8 | Karp_01862<br>Kato_01665 | 9 | TA686_0054<br>UT176_013<br>53 | UT76-<br>HP_01636 |
| group_7851 | 11 | chromosome partitioning protein ParA                                                            | ParA  | Boryong_01<br>207 | Gilliam_017<br>38 | Ikeda_0047<br>7 | Karp_01863<br>Kato_01666 | 0 | TA686_0055<br>UT176_013<br>52 | UT76-<br>HP_01635 |
| group_6059 | 11 | chromosome partitioning protein                                                                 | ParB  | Boryong_01<br>208 | Gilliam_017<br>39 | Ikeda_0047<br>6 | Karp_01864<br>Kato_01667 | 1 | TA686_0055<br>UT176_013<br>51 | UT76-<br>HP_01634 |
| group_5485 | 12 | rod shape-determining protein MreC                                                              | MreC  | Boryong_01<br>561 | Gilliam_021<br>76 | Ikeda_0033<br>6 | Karp_01810<br>Kato_01222 | 9 | TA686_0116<br>UT176_018<br>39 | UT76-<br>HP_01300 |
| group_7287 | 12 | rod shape-determining protein                                                                   | MreB  | Boryong_01<br>562 | Gilliam_021<br>75 | Ikeda_0033<br>5 | Karp_01811<br>Kato_01223 | 8 | TA686_0116<br>UT176_018<br>38 | UT76-<br>HP_01301 |
| group_5575 | 12 | dihydrolipoamide acetyltransferase                                                              |       | Boryong_01<br>563 | Gilliam_021<br>74 | Ikeda_0033<br>4 | Karp_01812<br>Kato_01224 | 7 | TA686_0116<br>UT176_018<br>37 | UT76-<br>HP_01302 |
| group_5491 | 13 | aspartate kinase                                                                                | AK    | Boryong_01<br>771 | Gilliam_019<br>06 | Ikeda_0077<br>2 | Karp_01348<br>Kato_01421 | 5 | TA686_0034<br>UT176_017<br>25 | UT76-<br>HP_01353 |
| group_5712 | 13 | hypothetical protein                                                                            |       | Boryong_01<br>772 | Gilliam_019<br>05 | Ikeda_0077<br>3 | Karp_01349<br>Kato_01420 | 6 | TA686_0034<br>UT176_017<br>24 | UT76-<br>HP_01354 |
| group_8049 | 13 | potassium transporter                                                                           |       | Boryong_01<br>773 | Gilliam_019<br>04 | Ikeda_0077<br>4 | Karp_01350<br>Kato_01419 | 7 | TA686_0034<br>UT176_017<br>23 | UT76-<br>HP_01355 |
| group_5713 | 13 | 5-formyltetrahydrofolate cyclo-ligase                                                           | YgfA  | Boryong_01<br>774 | Gilliam_019<br>03 | Ikeda_0077<br>5 | Karp_01351<br>Kato_01418 | 8 | TA686_0034<br>UT176_017<br>22 | UT76-<br>HP_01356 |
| group_5579 | 13 | hypothetical protein                                                                            |       | Boryong_01<br>775 | Gilliam_019<br>02 | Ikeda_0077<br>6 | Karp_01352<br>Kato_01417 | 9 | TA686_0034<br>UT176_017<br>21 | UT76-<br>HP_01357 |
| group_5496 | 14 | ankyrin repeat-containing protein 13                                                            | Ank13 | Boryong_01<br>925 | Gilliam_015<br>41 | Ikeda_0052<br>3 | Karp_01630<br>Kato_01772 | 5 | TA686_0009<br>UT176_012<br>72 | UT76-<br>HP_01784 |
| group_5411 | 14 | hypothetical protein                                                                            |       | Boryong_01<br>926 | Gilliam_015<br>42 | Ikeda_0052<br>2 | Karp_01631<br>Kato_01773 | 4 | TA686_0009<br>UT176_012<br>73 | UT76-<br>HP_01785 |
| group_5497 | 15 | heme A synthase                                                                                 |       | Boryong_02<br>136 | Gilliam_015<br>73 | Ikeda_0078<br>7 | Karp_01402<br>Kato_01407 | 3 | TA686_0121<br>UT176_017<br>11 | UT76-<br>HP_01347 |

|            |    |                                                                    |       |                   |                   |                 |            |            |   |            |           |    |                   |
|------------|----|--------------------------------------------------------------------|-------|-------------------|-------------------|-----------------|------------|------------|---|------------|-----------|----|-------------------|
| group_5549 | 16 | threonylcarbamoyl-AMP synthase                                     | TsaC  | Boryong_00<br>680 | Gilliam_022<br>54 | Ikeda_0108<br>0 | Karp_01998 | Kato_00910 | 5 | TA686_0234 | UT176_009 | 44 | UT76-<br>HP_01862 |
| group_5448 | 16 | glycine-tRNA ligase subunit beta                                   | GlyS  | Boryong_00<br>679 | Gilliam_022<br>55 | Ikeda_0108<br>1 | Karp_01999 | Kato_00909 | 4 | TA686_0234 | UT176_009 | 43 | UT76-<br>HP_01863 |
| group_5840 | 16 | glycine-tRNA ligase subunit alpha                                  | GlyQ  | Boryong_00<br>678 | Gilliam_022<br>56 | Ikeda_0108<br>2 | Karp_02000 | Kato_00908 | 3 | TA686_0234 | UT176_009 | 42 | UT76-<br>HP_01864 |
| group_5574 | 17 | competence protein ComEC                                           | ComEC | Boryong_01<br>456 | Gilliam_021<br>83 | Ikeda_0034<br>4 | Karp_01804 | Kato_01216 | 0 | TA686_0095 | UT176_018 | 48 | UT76-<br>HP_01293 |
| group_5585 | 18 | hypothetical protein                                               |       | Boryong_01<br>875 | Gilliam_014<br>46 | Ikeda_0106<br>2 | Karp_02242 | Kato_00929 | 3 | TA686_0208 | UT176_011 | 40 | UT76-<br>HP_01619 |
| group_5622 | 19 | hypothetical protein                                               |       | Boryong_00<br>133 | Gilliam_017<br>46 | Ikeda_0183<br>2 | Karp_00722 | Kato_02398 | 2 | TA686_0180 | UT176_020 | 92 | UT76-<br>HP_02218 |
| group_5776 | 19 | 2,3,4,5-tetrahydropyridine-2,6-dicarboxylate N-succinyltransferase | DapD  | Boryong_00<br>132 | Gilliam_017<br>45 | Ikeda_0183<br>1 | Karp_00723 | Kato_02399 | 3 | TA686_0180 | UT176_020 | 93 | UT76-<br>HP_02217 |
| group_5656 | 20 | MFS transporter permease                                           |       | Boryong_00<br>574 | Gilliam_009<br>85 | Ikeda_0161<br>5 | Karp_00351 | Kato_00491 | 3 | TA686_0038 | UT176_001 | 85 | UT76-<br>HP_00366 |
| group_5544 | 20 | sodium:pantothenate symporter                                      |       | Boryong_00<br>573 | Gilliam_009<br>86 | Ikeda_0161<br>6 | Karp_00352 | Kato_00492 | 2 | TA686_0038 | UT176_001 | 86 | UT76-<br>HP_00367 |
| group_5684 | 21 | SAM-dependent methyltransferase                                    |       | Boryong_00<br>940 | Gilliam_025<br>22 | Ikeda_0191<br>4 | Karp_00101 | Kato_02345 | 7 | TA686_0010 | UT176_005 | 53 | UT76-<br>HP_01014 |
| group_5705 | 22 | two-component sensor histidine kinase                              |       | Boryong_01<br>454 | Gilliam_021<br>81 | Ikeda_0034<br>2 | Karp_01806 | Kato_01218 | 2 | TA686_0095 | UT176_018 | 46 | UT76-<br>HP_01295 |
| group_6160 | 22 | sigma-54-dependent Fis family transcriptional regulator            |       | Boryong_01<br>453 | Gilliam_021<br>80 | Ikeda_0034<br>1 | Karp_01807 | Kato_01219 | 3 | TA686_0095 | UT176_018 | 45 | UT76-<br>HP_01296 |
| group_5483 | 22 | hypothetical protein                                               |       | Boryong_01<br>452 | Gilliam_021<br>79 | Ikeda_0034<br>0 | Karp_01808 | Kato_01220 | 4 | TA686_0095 | UT176_018 | 44 | UT76-<br>HP_01297 |
| group_5722 | 23 | aspartate aminotransferase                                         | AspC  | Boryong_02<br>006 | Gilliam_000<br>94 | Ikeda_0134<br>0 | Karp_00229 | Kato_00160 | 6 | TA686_0211 | UT176_001 | 01 | UT76-<br>HP_00570 |
| ubiG       | 23 | Ubiquinone biosynthesis O-methyltransferase                        | UbiG  | Boryong_02<br>007 | Gilliam_000<br>95 | Ikeda_0134<br>1 | Karp_00230 | Kato_00161 | 5 | TA686_0211 | UT176_001 | 02 | UT76-<br>HP_00569 |
| group_5723 | 23 | ABC transporter                                                    |       | Boryong_02<br>008 | Gilliam_000<br>96 | Ikeda_0134<br>2 | Karp_00231 | Kato_00162 | 4 | TA686_0211 | UT176_001 | 03 | UT76-<br>HP_00568 |
| group_5724 | 23 | hypothetical protein                                               |       | Boryong_02<br>009 | Gilliam_000<br>97 | Ikeda_0134<br>3 | Karp_00232 | Kato_00163 | 3 | TA686_0211 | UT176_001 | 04 | UT76-<br>HP_00567 |
| group_5900 | 23 | coproporphyrinogen III oxidase                                     |       | Boryong_02<br>010 | Gilliam_000<br>98 | Ikeda_0134<br>4 | Karp_00233 | Kato_00164 | 2 | TA686_0211 | UT176_001 | 05 | UT76-<br>HP_00566 |
| group_6112 | 23 | hypothetical protein                                               |       | Boryong_02<br>011 | Gilliam_000<br>99 | Ikeda_0134<br>5 | Karp_00234 | Kato_00165 | 1 | TA686_0211 | UT176_001 | 06 | UT76-<br>HP_00565 |
| group_5587 | 23 | DNA repair protein RecO                                            | RecO  | Boryong_02<br>012 | Gilliam_001<br>00 | Ikeda_0134<br>6 | Karp_00235 | Kato_00166 | 0 | TA686_0211 | UT176_001 | 07 | UT76-<br>HP_00564 |
| group_5732 | 24 | DNA helicase II                                                    | UvrD  | Boryong_02<br>217 | Gilliam_006<br>18 | Ikeda_0057<br>3 | Karp_01153 | Kato_01479 | 7 | TA686_0199 | UT176_014 | 93 | UT76-<br>HP_01067 |
| group_5740 | 25 | NAD-glutamate dehydrogenase                                        | GdhA  | Boryong_02<br>452 | Gilliam_010<br>83 | Ikeda_0211<br>6 | Karp_02529 | Kato_00707 | 5 | TA686_0176 | UT176_006 | 39 | UT76-<br>HP_00743 |
| group_5739 | 25 | tRNA uridine-5-carboxymethylaminomethyl(34) synthesis GTPase MnmE  |       | Boryong_02<br>451 | Gilliam_010<br>84 | Ikeda_0211<br>5 | Karp_02530 | Kato_00706 | 6 | TA686_0176 | UT176_006 | 40 | UT76-<br>HP_00744 |
| group_6137 | 25 | recombinase XerC                                                   | XerC  | Boryong_02<br>450 | Gilliam_010<br>85 | Ikeda_0211<br>4 | Karp_02531 | Kato_00705 | 7 | TA686_0176 | UT176_006 | 41 | UT76-<br>HP_00745 |
| group_6136 | 25 | RNA polymerase-binding protein DksA                                | DksA  | Boryong_02<br>449 | Gilliam_010<br>86 | Ikeda_0211<br>3 | Karp_02532 | Kato_00704 | 8 | TA686_0176 | UT176_006 | 42 | UT76-<br>HP_00746 |
| group_6135 | 25 | inorganic pyrophosphatase                                          |       | Boryong_02<br>448 | Gilliam_010<br>87 | Ikeda_0211<br>2 | Karp_02533 | Kato_00703 | 9 | TA686_0176 | UT176_006 | 43 | UT76-<br>HP_00747 |
| group_5415 | 25 | DNA polymerase III subunit delta'                                  | HolB  | Boryong_02<br>447 | Gilliam_010<br>88 | Ikeda_0211<br>1 | Karp_02534 | Kato_00702 | 0 | TA686_0177 | UT176_006 | 44 | UT76-<br>HP_00748 |
| group_5922 | 25 | ribosomal large subunit pseudouridine synthase                     |       | Boryong_02<br>446 | Gilliam_010<br>89 | Ikeda_0211<br>0 | Karp_02535 | Kato_00701 | 1 | TA686_0177 | UT176_006 | 45 | UT76-<br>HP_00749 |
| group_5791 | 26 | tetraacyldisaccharide 4'-kinase                                    | IpxK  | Boryong_00<br>218 | Gilliam_012<br>19 | Ikeda_0202<br>0 | Karp_00613 | Kato_00657 | 3 | TA686_0025 | UT176_004 | 27 | UT76-<br>HP_02120 |
| group_7640 | 26 | hypothetical protein                                               |       | Boryong_00<br>219 | Gilliam_012<br>20 | Ikeda_0202<br>1 | Karp_00614 | Kato_00658 | 4 | TA686_0025 | UT176_004 | 28 | UT76-<br>HP_02119 |
| group_5849 | 27 | transporter                                                        |       | Boryong_00<br>935 | Gilliam_025<br>19 | Ikeda_0191<br>0 | Karp_00104 | Kato_02349 | 3 | TA686_0164 | UT176_005 | 49 | UT76-<br>HP_01018 |
| glpE       | 27 | hypothetical protein                                               |       | Boryong_00<br>934 | Gilliam_025<br>18 | Ikeda_0190<br>9 | Karp_00105 | Kato_02350 | 2 | TA686_0164 | UT176_005 | 48 | UT76-<br>HP_01019 |
| group_5864 | 28 | protein translocase subunit SecF                                   | SecF  | Boryong_01<br>198 | Gilliam_017<br>29 | Ikeda_0048<br>6 | Karp_01854 | Kato_01657 | 1 | TA686_0054 | UT176_013 | 61 | UT76-<br>HP_01644 |
| group_6056 | 28 | DNA mismatch repair protein MutS                                   | MutS  | Boryong_01<br>199 | Gilliam_017<br>30 | Ikeda_0048<br>5 | Karp_01855 | Kato_01658 | 2 | TA686_0054 | UT176_013 | 60 | UT76-<br>HP_01643 |

|            |    |                                                              |      |                   |                   |                 |            |            |   |            |                 |                   |
|------------|----|--------------------------------------------------------------|------|-------------------|-------------------|-----------------|------------|------------|---|------------|-----------------|-------------------|
| group_6057 | 28 | ATP/ADP translocase                                          |      | Boryong_01<br>200 | Gilliam_017<br>31 | Ikeda_0048<br>4 | Karp_01856 | Kato_01659 | 3 | TA686_0054 | UT176_013<br>59 | UT76-<br>HP_01642 |
| group_5882 | 29 | haloacid dehalogenase                                        |      | Boryong_01<br>633 | Gilliam_016<br>59 | Ikeda_0094<br>4 | Karp_01021 | Kato_01991 | 2 | TA686_0073 | UT176_014<br>08 | UT76-<br>HP_00989 |
| group_7708 | 29 | DNA gyrase subunit B                                         | GyrB | Boryong_01<br>632 | Gilliam_016<br>58 | Ikeda_0094<br>5 | Karp_01022 | Kato_01992 | 3 | TA686_0073 | UT176_014<br>07 | UT76-<br>HP_00988 |
| group_5577 | 29 | hypothetical protein                                         |      | Boryong_01<br>631 | Gilliam_016<br>57 | Ikeda_0094<br>6 | Karp_01023 | Kato_01993 | 4 | TA686_0073 | UT176_014<br>06 | UT76-<br>HP_00987 |
| group_5881 | 29 | amino acid permease                                          |      | Boryong_01<br>630 | Gilliam_016<br>56 | Ikeda_0094<br>7 | Karp_01024 | Kato_01994 | 5 | TA686_0073 | UT176_014<br>05 | UT76-<br>HP_00986 |
| group_5895 | 30 | succinate dehydrogenase iron-sulfur subunit                  | SdhB | Boryong_01<br>938 | Gilliam_009<br>45 | Ikeda_0220<br>8 | Karp_02372 | Kato_02140 | 5 | TA686_0023 | UT176_006<br>89 | UT76-<br>HP_00157 |
| group_6106 | 30 | succinate dehydrogenase flavoprotein subunit                 | SdhA | Boryong_01<br>937 | Gilliam_009<br>44 | Ikeda_0220<br>9 | Karp_02373 | Kato_02139 | 6 | TA686_0023 | UT176_006<br>88 | UT76-<br>HP_00156 |
| group_5586 | 30 | succinate dehydrogenase, hydrophobic membrane anchor protein | SdhD | Boryong_01<br>936 | Gilliam_009<br>43 | Ikeda_0221<br>0 | Karp_02374 | Kato_02138 | 7 | TA686_0023 | UT176_006<br>87 | UT76-<br>HP_00155 |
| group_5721 | 30 | succinate dehydrogenase, cytochrome b556 subunit             | SdhC | Boryong_01<br>935 | Gilliam_009<br>42 | Ikeda_0221<br>1 | Karp_02375 | Kato_02137 | 8 | TA686_0023 | UT176_006<br>86 | UT76-<br>HP_00154 |
| group_5901 | 31 | hypothetical protein                                         |      | Boryong_02<br>018 | Gilliam_001<br>08 | Ikeda_0135<br>3 | Karp_00239 | Kato_00172 | 4 | TA686_0120 | UT176_001<br>13 | UT76-<br>HP_00558 |
| group_6113 | 31 | hypothetical protein                                         |      | Boryong_02<br>019 | Gilliam_001<br>09 | Ikeda_0135<br>4 | Karp_00240 | Kato_00173 | 5 | TA686_0120 | UT176_001<br>14 | UT76-<br>HP_00557 |
| group_8000 | 31 | 30S ribosomal protein S12                                    | RpsL | Boryong_02<br>020 | Gilliam_001<br>10 | Ikeda_0135<br>5 | Karp_00241 | Kato_00174 | 6 | TA686_0120 | UT176_001<br>15 | UT76-<br>HP_00556 |
| group_7893 | 31 | 30S ribosomal protein S7                                     | RpsG | Boryong_02<br>021 | Gilliam_001<br>11 | Ikeda_0135<br>6 | Karp_00242 | Kato_00175 | 7 | TA686_0120 | UT176_001<br>16 | UT76-<br>HP_00555 |
| group_7759 | 31 | elongation factor G                                          | EFG  | Boryong_02<br>022 | Gilliam_001<br>12 | Ikeda_0135<br>7 | Karp_00243 | Kato_00176 | 8 | TA686_0120 | UT176_001<br>17 | UT76-<br>HP_00554 |
| group_5902 | 31 | 30S ribosomal protein S1                                     | RpsA | Boryong_02<br>023 | Gilliam_001<br>13 | Ikeda_0135<br>8 | Karp_00244 | Kato_00177 | 9 | TA686_0120 | UT176_001<br>18 | UT76-<br>HP_00553 |
| group_6017 | 32 | 50S ribosomal protein L20                                    | RplT | Boryong_00<br>628 | Gilliam_023<br>47 | Ikeda_0090<br>2 | Karp_00926 | Kato_01948 | 3 | TA686_0083 | UT176_011<br>65 | UT76-<br>HP_00870 |
| group_7830 | 32 | 50S ribosomal protein L35                                    | RpmL | Boryong_00<br>627 | Gilliam_023<br>48 | Ikeda_0090<br>3 | Karp_00927 | Kato_01949 | 4 | TA686_0083 | UT176_011<br>66 | UT76-<br>HP_00871 |
| group_8150 | 32 | molecular chaperone HtpG                                     | HtpG | Boryong_00<br>626 | Gilliam_023<br>49 | Ikeda_0090<br>4 | Karp_00928 | Kato_01950 | 5 | TA686_0083 | UT176_011<br>67 | UT76-<br>HP_00872 |
| group_5657 | 32 | succinyl-diaminopimelate desuccinylase                       | DapE | Boryong_00<br>625 | Gilliam_023<br>50 | Ikeda_0090<br>5 | Karp_00929 | Kato_01951 | 6 | TA686_0083 | UT176_011<br>68 | UT76-<br>HP_00873 |
| group_6033 | 33 | DNA translocase FtsK                                         | FtsK | Boryong_00<br>894 | Gilliam_012<br>56 | Ikeda_0043<br>0 | Karp_01269 | Kato_01542 | 3 | TA686_0058 | UT176_016<br>46 | UT76-<br>HP_01670 |
| group_5682 | 33 | hypothetical protein                                         |      | Boryong_00<br>895 | Gilliam_012<br>57 | Ikeda_0042<br>9 | Karp_01270 | Kato_01541 | 4 | TA686_0058 | UT176_016<br>47 | UT76-<br>HP_01669 |
| group_7304 | 33 | energy-dependent translational throttle protein EttA         | EttA | Boryong_00<br>896 | Gilliam_012<br>58 | Ikeda_0042<br>8 | Karp_01271 | Kato_01540 | 5 | TA686_0058 | UT176_016<br>48 | UT76-<br>HP_01668 |
| group_5348 | 33 | hypothetical protein                                         |      | Boryong_00<br>897 | Gilliam_012<br>59 | Ikeda_0042<br>7 | Karp_01272 | Kato_01539 | 6 | TA686_0058 | UT176_016<br>49 | UT76-<br>HP_01667 |
| group_6064 | 34 | alpha/beta hydrolase                                         |      | Boryong_01<br>286 | Gilliam_016<br>21 | Ikeda_0065<br>5 | Karp_01105 | Kato_01727 | 1 | TA686_0081 | UT176_015<br>36 | UT76-<br>HP_00785 |
| group_5701 | 34 | iron-sulfur-binding protein                                  |      | Boryong_01<br>285 | Gilliam_016<br>20 | Ikeda_0065<br>4 | Karp_01106 | Kato_01726 | 2 | TA686_0081 | UT176_015<br>35 | UT76-<br>HP_00784 |
| group_5400 | 34 | aminotransferase class V-fold PLP-dependent enzyme           |      | Boryong_01<br>284 | Gilliam_016<br>19 | Ikeda_0065<br>3 | Karp_01107 | Kato_01725 | 3 | TA686_0081 | UT176_015<br>34 | UT76-<br>HP_00783 |
| group_6063 | 34 | cysteine desulfurase                                         |      | Boryong_01<br>283 | Gilliam_016<br>18 | Ikeda_0065<br>2 | Karp_01108 | Kato_01724 | 4 | TA686_0081 | UT176_015<br>33 | UT76-<br>HP_00782 |
| group_5868 | 34 | iron-sulfur cluster scaffold-like protein                    |      | Boryong_01<br>282 | Gilliam_016<br>17 | Ikeda_0065<br>1 | Karp_01109 | Kato_01723 | 5 | TA686_0081 | UT176_015<br>32 | UT76-<br>HP_00781 |
| group_6062 | 34 | iron-sulfur cluster assembly accessory protein               |      | Boryong_01<br>281 | Gilliam_016<br>16 | Ikeda_0065<br>0 | Karp_01110 | Kato_01722 | 6 | TA686_0081 | UT176_015<br>31 | UT76-<br>HP_00780 |
| group_5564 | 34 | co-chaperone HscB                                            | HscB | Boryong_01<br>280 | Gilliam_016<br>15 | Ikeda_0064<br>9 | Karp_01111 | Kato_01721 | 7 | TA686_0081 | UT176_015<br>30 | UT76-<br>HP_00779 |
| group_5867 | 34 | molecular chaperone HscA                                     | HscA | Boryong_01<br>279 | Gilliam_016<br>14 | Ikeda_0064<br>8 | Karp_01112 | Kato_01720 | 8 | TA686_0081 | UT176_015<br>29 | UT76-<br>HP_00778 |
| group_5563 | 34 | (2Fe-2S) ferredoxin                                          |      | Boryong_01<br>278 | Gilliam_016<br>13 | Ikeda_0064<br>7 | Karp_01113 | Kato_01719 | 9 | TA686_0081 | UT176_015<br>28 | UT76-<br>HP_00777 |
| group_6072 | 35 | electron transporter                                         |      | Boryong_01<br>395 | Gilliam_001<br>96 | Ikeda_0107<br>6 | Karp_01763 | Kato_00913 | 1 | TA686_0225 | UT176_011<br>54 | UT76-<br>HP_01631 |

|            |    |                                                                      |      |                   |                   |                 |            |            |   |            |                 |                   |
|------------|----|----------------------------------------------------------------------|------|-------------------|-------------------|-----------------|------------|------------|---|------------|-----------------|-------------------|
| group_6074 | 36 | single-stranded DNA-binding protein                                  |      | Boryong_01<br>420 | Gilliam_019<br>83 | Ikeda_0083<br>0 | Karp_01239 | Kato_01364 | 6 | TA686_0178 | UT176_018<br>02 | UT76-<br>HP_01743 |
| group_5704 | 36 | hypothetical protein                                                 |      | Boryong_01<br>419 | Gilliam_019<br>82 | Ikeda_0083<br>1 | Karp_01240 | Kato_01363 | 5 | TA686_0178 | UT176_018<br>03 | UT76-<br>HP_01742 |
| group_6078 | 37 | malate dehydrogenase                                                 | Mdh  | Boryong_01<br>520 | Gilliam_015<br>26 | Ikeda_0066<br>3 | Karp_01409 | Kato_01734 | 1 | TA686_0254 | UT176_014<br>50 | UT76-<br>HP_01425 |
| group_6077 | 37 | permease                                                             |      | Boryong_01<br>519 | Gilliam_015<br>27 | Ikeda_0066<br>4 | Karp_01410 | Kato_01735 | 0 | TA686_0254 | UT176_014<br>51 | UT76-<br>HP_01426 |
| group_5484 | 37 | hypothetical protein                                                 |      | Boryong_01<br>518 | Gilliam_015<br>28 | Ikeda_0066<br>5 | Karp_01411 | Kato_01736 | 9 | TA686_0253 | UT176_014<br>52 | UT76-<br>HP_01427 |
| group_6083 | 38 | cytochrome b                                                         | CybB | Boryong_01<br>614 | Gilliam_026<br>91 | Ikeda_0081<br>9 | Karp_01467 | Kato_01374 | 3 | TA686_0079 | UT176_016<br>60 | UT76-<br>HP_01121 |
| group_5878 | 38 | ubiquinol-cytochrome c reductase iron-sulfur subunit                 | PetA | Boryong_01<br>613 | Gilliam_026<br>90 | Ikeda_0082<br>0 | Karp_01468 | Kato_01373 | 2 | TA686_0079 | UT176_016<br>61 | UT76-<br>HP_01120 |
| group_5486 | 38 | hypothetical protein                                                 |      | Boryong_01<br>612 | Gilliam_026<br>89 | Ikeda_0082<br>1 | Karp_01469 | Kato_01372 | 1 | TA686_0079 | UT176_016<br>62 | UT76-<br>HP_01119 |
| group_5877 | 38 | heme exporter protein B                                              | CcmB | Boryong_01<br>611 | Gilliam_026<br>88 | Ikeda_0082<br>2 | Karp_01470 | Kato_01371 | 0 | TA686_0079 | UT176_016<br>63 | UT76-<br>HP_01118 |
| group_5709 | 38 | cytochrome c biogenesis protein CcmA                                 | CcmA | Boryong_01<br>610 | Gilliam_026<br>87 | Ikeda_0082<br>3 | Karp_01471 | Kato_01370 | 9 | TA686_0078 | UT176_016<br>64 | UT76-<br>HP_01117 |
| group_6087 | 39 | 2-hydroxyacid dehydrogenase                                          |      | Boryong_01<br>640 | Gilliam_016<br>66 | Ikeda_0093<br>7 | Karp_01014 | Kato_01984 | 5 | TA686_0072 | UT176_014<br>15 | UT76-<br>HP_00996 |
| group_7914 | 39 | cation:proton antiporter                                             |      | Boryong_01<br>639 | Gilliam_016<br>65 | Ikeda_0093<br>8 | Karp_01015 | Kato_01985 | 6 | TA686_0072 | UT176_014<br>14 | UT76-<br>HP_00995 |
| group_6086 | 39 | cation:proton antiporter                                             |      | Boryong_01<br>638 | Gilliam_016<br>64 | Ikeda_0093<br>9 | Karp_01016 | Kato_01986 | 7 | TA686_0072 | UT176_014<br>13 | UT76-<br>HP_00994 |
| group_5883 | 39 | sodium:proton antiporter                                             |      | Boryong_01<br>637 | Gilliam_016<br>63 | Ikeda_0094<br>0 | Karp_01017 | Kato_01987 | 8 | TA686_0072 | UT176_014<br>12 | UT76-<br>HP_00993 |
| group_5710 | 39 | sodium:proton antiporter                                             |      | Boryong_01<br>636 | Gilliam_016<br>62 | Ikeda_0094<br>1 | Karp_01018 | Kato_01988 | 9 | TA686_0072 | UT176_014<br>11 | UT76-<br>HP_00992 |
| group_8081 | 39 | sodium:proton antiporter                                             |      | Boryong_01<br>635 | Gilliam_016<br>61 | Ikeda_0094<br>2 | Karp_01019 | Kato_01989 | 0 | TA686_0073 | UT176_014<br>10 | UT76-<br>HP_00991 |
| group_6098 | 40 | hypothetical protein                                                 |      | Boryong_01<br>851 | Gilliam_014<br>22 | Ikeda_0103<br>7 | Karp_02217 | Kato_00953 | 6 | TA686_0149 | UT176_013<br>71 | UT76-<br>HP_01595 |
| group_6107 | 41 | S26 family signal peptidase                                          |      | Boryong_01<br>941 | Gilliam_009<br>52 | Ikeda_0220<br>5 | Karp_00806 | Kato_02077 | 2 | TA686_0027 | UT176_008<br>90 | UT76-<br>HP_02017 |
| group_6108 | 41 | ribonuclease III                                                     | Rnc  | Boryong_01<br>942 | Gilliam_009<br>53 | Ikeda_0220<br>4 | Karp_00807 | Kato_02076 | 3 | TA686_0027 | UT176_008<br>89 | UT76-<br>HP_02016 |
| group_6121 | 42 | nucleoside-diphosphate kinase                                        | Ndk  | Boryong_02<br>109 | Gilliam_008<br>55 | Ikeda_0214<br>9 | Karp_02170 | Kato_00743 | 1 | TA686_0108 | UT176_019<br>40 | UT76-<br>HP_00186 |
| group_6122 | 43 | hypothetical protein                                                 |      | Boryong_02<br>132 | Gilliam_015<br>67 | Ikeda_0079<br>1 | Karp_01397 | Kato_01402 | 8 | TA686_0232 | UT176_017<br>08 | UT76-<br>HP_01343 |
| group_6132 | 44 | phospholipase D family protein                                       |      | Boryong_02<br>222 | Gilliam_006<br>12 | Ikeda_0056<br>7 | Karp_01146 | Kato_01485 | 8 | TA686_0162 | UT176_014<br>87 | UT76-<br>HP_01062 |
| group_6754 | 45 | elongation factor 4                                                  | lepA | Boryong_01<br>410 | Gilliam_021<br>08 | Ikeda_0083<br>4 | Karp_01242 | Kato_01360 | 8 | TA686_0136 | UT176_013<br>01 | UT76-<br>HP_01739 |
| group_5874 | 45 | peptide chain release factor 1                                       | PrfA | Boryong_01<br>409 | Gilliam_021<br>07 | Ikeda_0083<br>5 | Karp_01243 | Kato_01359 | 7 | TA686_0136 | UT176_013<br>02 | UT76-<br>HP_01738 |
| group_7286 | 46 | DNA-binding protein                                                  |      | Boryong_00<br>490 | Gilliam_007<br>21 | Ikeda_0002<br>7 | Karp_02417 | Kato_02102 | 7 | TA686_0075 | UT176_006<br>21 | UT76-<br>HP_01986 |
| surA       | 46 | Chaperone SurA                                                       | SurA | Boryong_00<br>489 | Gilliam_007<br>20 | Ikeda_0002<br>8 | Karp_02418 | Kato_02101 | 8 | TA686_0075 | UT176_006<br>20 | UT76-<br>HP_01985 |
| group_6007 | 46 | 16S rRNA (adenine(1518)-N(6)/adenine(1519)-N(6))-dimethyltransferase |      | Boryong_00<br>488 | Gilliam_007<br>19 | Ikeda_0002<br>9 | Karp_02419 | Kato_02100 | 9 | TA686_0075 | UT176_006<br>19 | UT76-<br>HP_01984 |
| group_5824 | 46 | DNA recombination protein RmuC                                       | RmuC | Boryong_00<br>487 | Gilliam_007<br>18 | Ikeda_0003<br>0 | Karp_02420 | Kato_02099 | 0 | TA686_0076 | UT176_006<br>18 | UT76-<br>HP_01983 |
| group_5650 | 46 | zinc metalloprotease                                                 |      | Boryong_00<br>486 | Gilliam_007<br>17 | Ikeda_0003<br>1 | Karp_02421 | Kato_02098 | 1 | TA686_0076 | UT176_006<br>17 | UT76-<br>HP_01982 |
| group_5539 | 46 | outer membrane protein assembly factor BamA                          | BamA | Boryong_00<br>485 | Gilliam_007<br>16 | Ikeda_0003<br>2 | Karp_02422 | Kato_02097 | 2 | TA686_0076 | UT176_006<br>16 | UT76-<br>HP_01981 |
| group_5649 | 46 | thiol reductase thioredoxin                                          |      | Boryong_00<br>484 | Gilliam_007<br>15 | Ikeda_0003<br>3 | Karp_02423 | Kato_02096 | 3 | TA686_0076 | UT176_006<br>15 | UT76-<br>HP_01980 |
| group_7769 | 47 | thioredoxin-disulfide reductase                                      | TrxB | Boryong_00<br>020 | Gilliam_000<br>24 | Ikeda_0175<br>7 | Karp_00011 | Kato_00071 | 5 | TA686_0237 | UT176_003<br>64 | UT76-<br>HP_00026 |
| group_7112 | 47 | permease                                                             |      | Boryong_00<br>021 | Gilliam_000<br>25 | Ikeda_0175<br>8 | Karp_00012 | Kato_00070 | 6 | TA686_0237 | UT176_003<br>63 | UT76-<br>HP_00025 |
| group_5621 | 47 | translocation protein TolB                                           | TolB | Boryong_00<br>022 | Gilliam_000<br>26 | Ikeda_0175<br>9 | Karp_00013 | Kato_00069 | 7 | TA686_0237 | UT176_003<br>62 | UT76-<br>HP_00024 |



|            |    |                                                        |      |                   |                   |                 |                          |   |                         |    |                   |
|------------|----|--------------------------------------------------------|------|-------------------|-------------------|-----------------|--------------------------|---|-------------------------|----|-------------------|
| group_5775 | 47 | dihydrolipoyl dehydrogenase                            | lpdA | Boryong_00<br>023 | Gilliam_000<br>27 | Ikeda_0176<br>0 | Karp_00014<br>Kato_00068 | 8 | TA686_0237<br>UT176_003 | 61 | UT76-<br>HP_00023 |
| group_5425 | 47 | SAM-dependent methyltransferase                        |      | Boryong_00<br>024 | Gilliam_000<br>28 | Ikeda_0176<br>1 | Karp_00015<br>Kato_00067 | 9 | TA686_0237<br>UT176_003 | 60 | UT76-<br>HP_00022 |
| group_5426 | 47 | hypothetical protein                                   |      | Boryong_00<br>025 | Gilliam_000<br>29 | Ikeda_0176<br>2 | Karp_00016<br>Kato_00066 | 0 | TA686_0238<br>UT176_003 | 59 | UT76-<br>HP_00021 |
| group_7894 | 48 | type I methionyl aminopeptidase                        | Map  | Boryong_01<br>573 | Gilliam_019<br>47 | Ikeda_0042<br>0 | Karp_01288<br>Kato_01532 | 5 | TA686_0076<br>UT176_017 | 51 | UT76-<br>HP_01652 |
| group_7905 | 49 | ubiquinone biosynthesis protein UbiB                   | UbiB | Boryong_01<br>795 | Gilliam_021<br>98 | Ikeda_0070<br>5 | Karp_01872<br>Kato_01873 | 4 | TA686_0028<br>UT176_017 | 00 | UT76-<br>HP_01485 |
| group_5580 | 49 | ubiquinone biosynthesis protein                        | UbiJ | Boryong_01<br>796 | Gilliam_021<br>97 | Ikeda_0070<br>4 | Karp_01873<br>Kato_01872 | 3 | TA686_0028<br>UT176_017 | 01 | UT76-<br>HP_01486 |
| group_6093 | 49 | ribosome maturation factor                             |      | Boryong_01<br>797 | Gilliam_021<br>96 | Ikeda_0070<br>3 | Karp_01874<br>Kato_01871 | 2 | TA686_0028<br>UT176_017 | 02 | UT76-<br>HP_01487 |
| group_6094 | 49 | transcription termination/antitermination protein NusA | NusA | Boryong_01<br>798 | Gilliam_021<br>95 | Ikeda_0070<br>2 | Karp_01875<br>Kato_01870 | 1 | TA686_0028<br>UT176_017 | 03 | UT76-<br>HP_01488 |
| group_5889 | 49 | translation initiation factor IF-2                     | InfB | Boryong_01<br>799 | Gilliam_021<br>94 | Ikeda_0070<br>1 | Karp_01876<br>Kato_01869 | 0 | TA686_0028<br>UT176_017 | 04 | UT76-<br>HP_01489 |
| group_7895 | 49 | ribosome-binding factor A                              | RbfA | Boryong_01<br>800 | Gilliam_021<br>93 | Ikeda_0070<br>0 | Karp_01877<br>Kato_01868 | 9 | TA686_0027<br>UT176_017 | 05 | UT76-<br>HP_01490 |
| group_7960 | 50 | preprotein translocase subunit YajC                    | YajC | Boryong_02<br>000 | Gilliam_000<br>87 | Ikeda_0133<br>0 | Karp_00223<br>Kato_00152 | 3 | TA686_0231<br>UT176_008 | 45 | UT76-<br>HP_00576 |
| group_6110 | 50 | protein translocase subunit SecD                       | SecD | Boryong_02<br>001 | Gilliam_000<br>88 | Ikeda_0133<br>1 | Karp_00224<br>Kato_00153 | 2 | TA686_0231<br>UT176_008 | 46 | UT76-<br>HP_00575 |
| group_8117 | 51 | peptidase S66                                          |      | Boryong_00<br>304 | Gilliam_005<br>80 | Ikeda_0159<br>2 | Karp_00511<br>Kato_00468 | 1 | TA686_0176<br>UT176_002 | 61 | UT76-<br>HP_00436 |

| Sample     | Genome Length | Length of repetitive sequence (bp) | Percentage of genome which is repetitive |
|------------|---------------|------------------------------------|------------------------------------------|
| Boryong    | 2127051       | 895302                             | 42                                       |
| FPW1038    | 2035338       | 957348                             | 47                                       |
| Gilliam    | 2465012       | 1246424                            | 51                                       |
| Ikeda      | 2008987       | 721214                             | 36                                       |
| Karp       | 2469803       | 1210014                            | 49                                       |
| Kato       | 2319449       | 1050415                            | 45                                       |
| TA686      | 2254553       | 976333                             | 43                                       |
| TA763      | 2089396       | 895735                             | 43                                       |
| UT176      | 1932116       | 635697                             | 33                                       |
| UT76       | 2078193       | 868414                             | 42                                       |
| REIS       | 2100092       | 426115                             | 20                                       |
| Wilmington | 1111496       | 0                                  | 0                                        |

**Table S5.** Total length of repetitive genome sequences in each strain, and as a percentage of the genome. REIS: *Rickettsia endosymbiont* of *Ixodes scapularis*. Wilmington: *Rickettsia typhi* strain Wilmington.

| Product                              | Boryong | Gilliam | Ikeda | Karp | Kato | TA686 | UT176 | UT76 |
|--------------------------------------|---------|---------|-------|------|------|-------|-------|------|
| (p)pGpp hydrolase                    | 37      | 31      | 25    | 40   | 26   | 14    | 16    | 25   |
| (p)ppGpp synthetase                  | 2       | 2       | 1     | 5    | 1    | 0     | 2     | 2    |
| spoT ppGpp hydrolase                 | 3       | 15      | 7     | 16   | 9    | 11    | 5     | 5    |
| ABC transporter ATP-binding protein  | 1       | 2       | 2     | 2    | 3    | 2     | 1     | 3    |
| Aconitate hydratase A                | 1       | 1       | 2     | 1    | 2    | 0     | 1     | 1    |
| All ankyrin proteins                 | 43      | 46      | 40    | 58   | 37   | 39    | 37    | 38   |
| ankyrin                              | 14      | 26      | 18    | 33   | 23   | 21    | 21    | 25   |
| Ankyrin repeat-containing protein    | 13      | 10      | 13    | 11   | 7    | 4     | 10    | 8    |
| ankyrin repeat-containing protein 09 | 4       | 6       | 3     | 4    | 2    | 8     | 3     | 3    |
| ankyrin repeat-containing protein 13 | 3       | 1       | 1     | 1    | 1    | 0     | 1     | 1    |
| ankyrin repeat-containing protein 16 | 9       | 0       | 2     | 7    | 2    | 2     | 1     | 0    |
| ankyrin repeat-containing protein 17 | 0       | 1       | 1     | 1    | 0    | 4     | 1     | 0    |
| ankyrin repeat-containing protein 19 | 0       | 2       | 2     | 1    | 2    | 0     | 0     | 1    |
| ATP-binding protein                  | 48      | 85      | 63    | 99   | 91   | 97    | 44    | 87   |
| Cell division protein FtsB           | 1       | 2       | 1     | 1    | 1    | 1     | 1     | 1    |
| All conjugal transfer proteins       | 461     | 532     | 378   | 570  | 502  | 462   | 330   | 481  |
| conjugal transfer protein            | 166     | 202     | 138   | 242  | 181  | 202   | 137   | 194  |
| conjugal transfer protein TraA       | 75      | 86      | 60    | 83   | 56   | 64    | 41    | 62   |
| conjugal transfer protein TraC       | 70      | 50      | 39    | 40   | 65   | 37    | 34    | 61   |
| conjugal transfer protein TraD       | 1       | 0       | 2     | 2    | 2    | 2     | 0     | 0    |
| conjugal transfer protein TraG       | 13      | 29      | 21    | 28   | 24   | 25    | 19    | 24   |
| conjugal transfer protein TraH       | 41      | 37      | 37    | 44   | 52   | 34    | 24    | 41   |
| conjugal transfer protein TraI       | 41      | 62      | 32    | 65   | 48   | 50    | 25    | 33   |
| conjugal transfer protein TraN       | 46      | 49      | 30    | 38   | 40   | 27    | 36    | 45   |

|  |                                                                |     |     |     |     |     |     |     |     |
|--|----------------------------------------------------------------|-----|-----|-----|-----|-----|-----|-----|-----|
|  | type-F conjugative transfer system pilin assembly protein TrbC | 0   | 0   | 0   | 2   | 0   | 0   | 0   | 0   |
|  | type-F conjugative transfer system protein TraW                | 8   | 17  | 19  | 26  | 34  | 21  | 14  | 21  |
|  | deoxyribodipyrimidine photo-lyase                              | 4   | 1   | 1   | 1   | 1   | 0   | 1   | 0   |
|  | DNA helicase                                                   | 0   | 0   | 1   | 3   | 6   | 0   | 0   | 1   |
|  | DNA methyltransferase                                          | 27  | 32  | 17  | 29  | 26  | 22  | 17  | 28  |
|  | DNA polymerase III subunit epsilon                             | 1   | 1   | 1   | 1   | 1   | 2   | 1   | 1   |
|  | elongation factor Tu                                           | 2   | 2   | 2   | 2   | 2   | 2   | 2   | 2   |
|  | exodeoxyribonuclease III                                       | 3   | 1   | 4   | 4   | 2   | 1   | 2   | 3   |
|  | exodeoxyribonuclease VII small subunit                         | 1   | 1   | 1   | 1   | 1   | 2   | 1   | 1   |
|  | Group II intron-encoded protein LtrA                           | 0   | 0   | 0   | 0   | 0   | 4   | 0   | 0   |
|  | guanosine polyphosphate pyrophosphohydrolase                   | 3   | 2   | 10  | 3   | 9   | 11  | 1   | 5   |
|  | helix-turn-helix domain-containing protein                     | 3   | 0   | 0   | 0   | 0   | 4   | 0   | 0   |
|  | histidine kinase                                               | 1   | 8   | 9   | 8   | 13  | 16  | 1   | 9   |
|  | HNH endonuclease                                               | 4   | 2   | 1   | 32  | 19  | 37  | 0   | 3   |
|  | hydrolase                                                      | 5   | 13  | 13  | 11  | 20  | 12  | 7   | 14  |
|  | hypothetical protein                                           | 321 | 250 | 180 | 259 | 241 | 242 | 134 | 188 |
|  | integrase                                                      | 69  | 77  | 69  | 71  | 92  | 87  | 44  | 82  |
|  | All transposases                                               | 338 | 602 | 306 | 325 | 242 | 409 | 487 | 242 |
|  | DDE transposase family protein                                 | 0   | 0   | 4   | 2   | 1   | 3   | 0   | 1   |
|  | IS110 family transposase                                       | 19  | 8   | 34  | 22  | 14  | 23  | 13  | 5   |
|  | IS5 family transposase ISOt6                                   | 199 | 157 | 101 | 143 | 85  | 163 | 73  | 87  |
|  | IS630 family transposase                                       | 26  | 342 | 71  | 27  | 37  | 83  | 316 | 29  |
|  | transposase                                                    | 94  | 95  | 96  | 131 | 105 | 137 | 85  | 120 |
|  | lipase LipB                                                    | 1   | 1   | 1   | 1   | 1   | 1   | 0   | 2   |
|  | lysine--tRNA ligase                                            | 1   | 1   | 1   | 1   | 1   | 2   | 1   | 1   |
|  | membrane protein                                               | 12  | 27  | 17  | 34  | 25  | 20  | 16  | 22  |
|  | N-6 DNA methylase                                              | 6   | 1   | 0   | 0   | 0   | 0   | 0   | 0   |
|  | NADP-dependent oxidoreductase                                  | 1   | 1   | 2   | 1   | 1   | 1   | 1   | 1   |
|  | peroxiredoxin                                                  | 1   | 2   | 4   | 4   | 7   | 5   | 2   | 2   |
|  | phosphatidate cytidyltransferase                               | 1   | 2   | 1   | 1   | 1   | 1   | 1   | 1   |
|  | phosphoribosylaminoimidazolesuccinocarboxamide synthase        | 1   | 1   | 1   | 1   | 1   | 3   | 2   | 2   |
|  | polyribonucleotide nucleotidyltransferase                      | 1   | 1   | 1   | 1   | 1   | 1   | 1   | 2   |
|  | preprotein translocase SecA subunit-like protein               | 0   | 4   | 2   | 7   | 2   | 9   | 0   | 2   |
|  | Propionyl-CoA carboxylase beta chain                           | 0   | 1   | 2   | 1   | 2   | 0   | 1   | 1   |
|  | repeat-containing protein D                                    | 4   | 0   | 4   | 1   | 2   | 0   | 1   | 1   |
|  | replicative DNA helicase                                       | 47  | 33  | 28  | 40  | 36  | 39  | 17  | 34  |
|  | reverse transcriptase                                          | 58  | 19  | 32  | 5   | 33  | 23  | 2   | 6   |
|  | RNA-binding protein                                            | 3   | 2   | 5   | 10  | 3   | 12  | 4   | 4   |
|  | sodium:proline symporter                                       | 4   | 4   | 7   | 6   | 8   | 5   | 5   | 5   |
|  | TAL effector protein PthXo1                                    | 1   | 0   | 3   | 2   | 3   | 0   | 1   | 3   |
|  | All TPR repeat-containing proteins                             | 22  | 40  | 18  | 29  | 37  | 24  | 22  | 27  |
|  | TPR repeat-containing protein O3                               | 0   | 12  | 6   | 8   | 10  | 7   | 11  | 4   |
|  | TPR repeat-containing protein O8                               | 22  | 28  | 12  | 21  | 27  | 17  | 11  | 23  |
|  | tryptophan--tRNA ligase                                        | 2   | 1   | 1   | 1   | 1   | 1   | 1   | 1   |
|  | UDP pyrophosphate synthase                                     | 1   | 2   | 1   | 1   | 1   | 1   | 1   | 1   |

**Table S6.** Repeat gene counts in each strain. Repeat genes were grouped by protein similarity and annotated with the product of the longest gene in the group where annotations differed.

| Sample  | Pseudogenes | Truncated 5' | Truncated 3' | Frameshift |
|---------|-------------|--------------|--------------|------------|
| Boryong | 432         | 219          | 302          | 46         |
| Gilliam | 484         | 262          | 278          | 51         |
| Ikeda   | 257         | 141          | 186          | 38         |
| Karp    | 321         | 105          | 236          | 47         |
| Kato    | 286         | 143          | 178          | 57         |
| TA686   | 453         | 200          | 307          | 50         |
| UT176   | 465         | 107          | 392          | 53         |
| UT76    | 319         | 149          | 203          | 52         |

**Table S7.** Pseudogenes and causes of pseudogenisation for each strain. The causes are not mutually exclusive, and may sum to greater than the total number of pseudogenes.

|             | 56kDa | 47kDa | MLST | Core genome |
|-------------|-------|-------|------|-------------|
| 56kDa       | -     | 10    | 10   | 8           |
| 47kDa       | 10    | -     | 8    | 6           |
| MLST        | 10    | 8     | -    | 10          |
| Core genome | 8     | 6     | 10   | -           |

**Table S8.** Robinson-Foulds distances between phylogenetic trees.
